# Supplementary material for: Visible-light-driven MWCNT@TiO2 core–shell nanocomposites and the roles of MWCNTs on the surface chemistry, optical properties and reactivity in CO2 photoreduction
Source: Royal Society of Chemistry journal article supplement (doi:10.1039/c4ra02561j), 2014-01-01
Supplement: c4ra02561j1.pdf [file c4ra02561j1.pdf]

## Electronic Supplementary Information

### **Visible-Light-Driven MWCNT@TiO<sub>2</sub> Core-shell Nanocomposites and the Roles of MWCNTs on the Surface Chemistry, Optical Properties and Reactivity in CO<sub>2</sub> Photoreduction**

Meei Mei Gui<sup>a</sup>, Siang-Piao Chai<sup>a,\*</sup>, Bo-Qing Xu<sup>b</sup>, Abdul Rahman Mohamed<sup>c</sup>

<sup>a</sup>Multidisciplinary Platform of Advanced Engineering, Chemical Engineering  
Discipline, School of Engineering, Monash University, Jalan Lagoon Selatan, 46150  
Bandar Sunway, Selangor, Malaysia

<sup>b</sup>Innovative Catalysis Program, Key Lab of Organic Optoelectronics & Molecular  
Engineering, Department of Chemistry, Tsinghua University, Beijing, 100084, China

<sup>c</sup>Low Carbon Economy (LCE) Group, School of Chemical Engineering, Universiti  
Sains Malaysia, Engineering Campus, Seri Ampangan, 14300 Nibong Tebal, Pulau  
Pinang, Malaysia

\*Corresponding author. Tel.: +603-55146234; Fax: +603-55146207. E-mail address:  
[chai.siang.piao@monash.edu](mailto:chai.siang.piao@monash.edu) (S.-P. Chai)

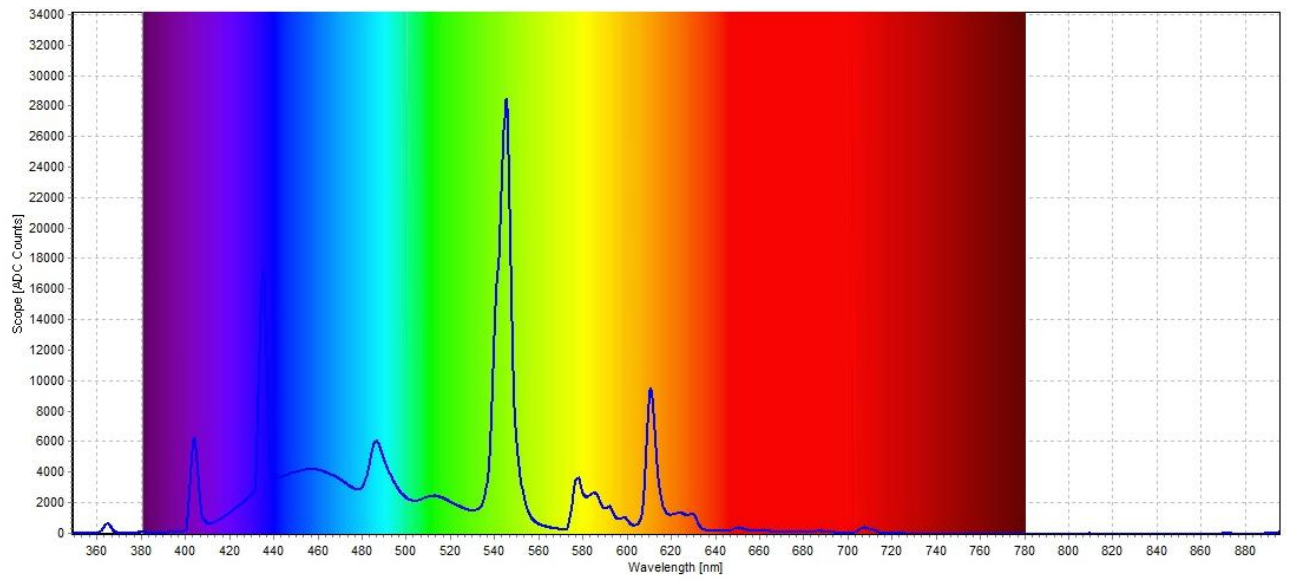

Figure S1. Light spectrum of the energy saving light source used.
